# Supplementary material for: Rice husk ash-based silica-supported iron catalyst coupled with Fenton-like process for the abatement of rice mill wastewater
Source: Springer Nature journal article supplement (doi:10.1007/s10098-016-1165-4), 2016-03-31
Supplement: MOESM1 [file 10161882]

**
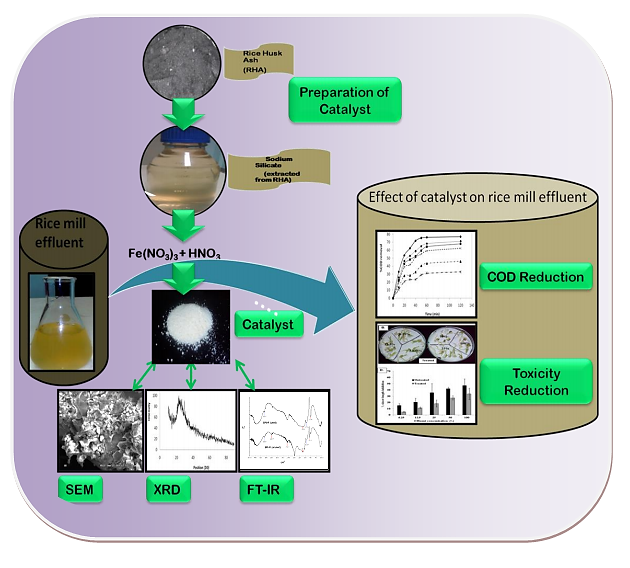
Fig. S1** Concise representation of rice husk ash based silica supported iron catalyst coupled with Fenton-like process for the abatement of rice mill wastewater
